# Supplementary material for: Bimetallic Ag–Cu alloy nanoparticles as a highly active catalyst for the enamination of 1,3-dicarbonyl compounds
Source: Royal Society of Chemistry journal article supplement (doi:10.1039/c6ra04569c), 2016-01-01
Supplement: c6ra04569c1.pdf [file c6ra04569c1.pdf]

## Supporting Information

### **Bimetallic Ag-Cu Alloy Nanoparticles as Highly Active Catalyst for Enamination of 1, 3 dicarbonyl Compounds**

Lipeeka Rout,<sup>a</sup> Aniket Kumar,<sup>a</sup> Rajendra S. Dhaka<sup>b</sup> and Priyabrat Dash\*<sup>a</sup>

<sup>a</sup> Department of Chemistry, National Institute of Technology, Rourkela, Odisha, India, 769008

<sup>b</sup> Novel Materials and Interface Physics Laboratory, Department of Physics, Indian Institute of Technology Delhi, HauzKhas, New Delhi-110016, India

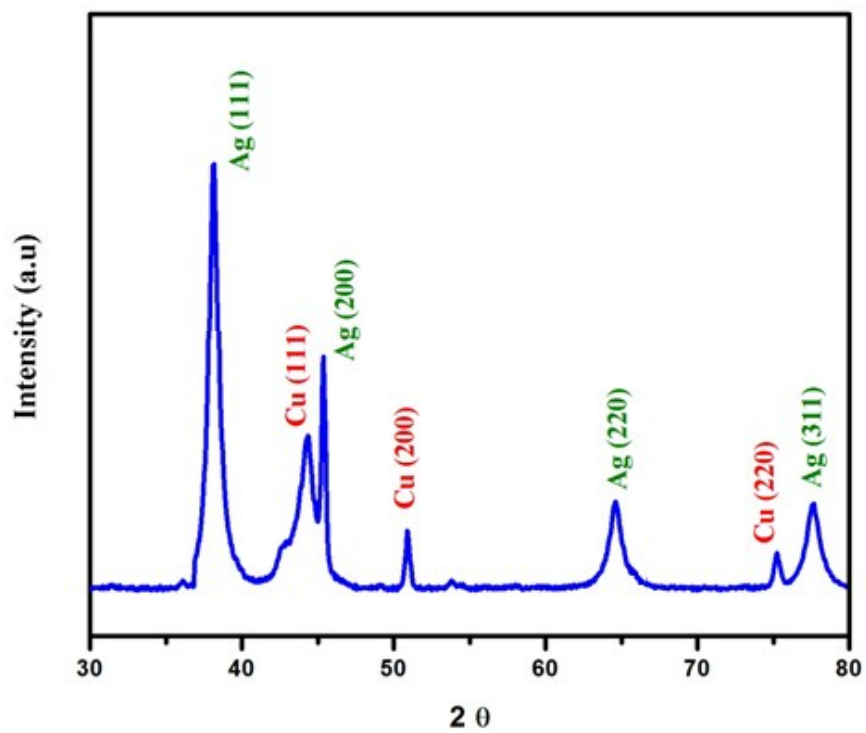

Fig. S1. XRD pattern of  $\text{Ag}_1\text{-Cu}_3$  after 4 cycles of catalytic reaction.

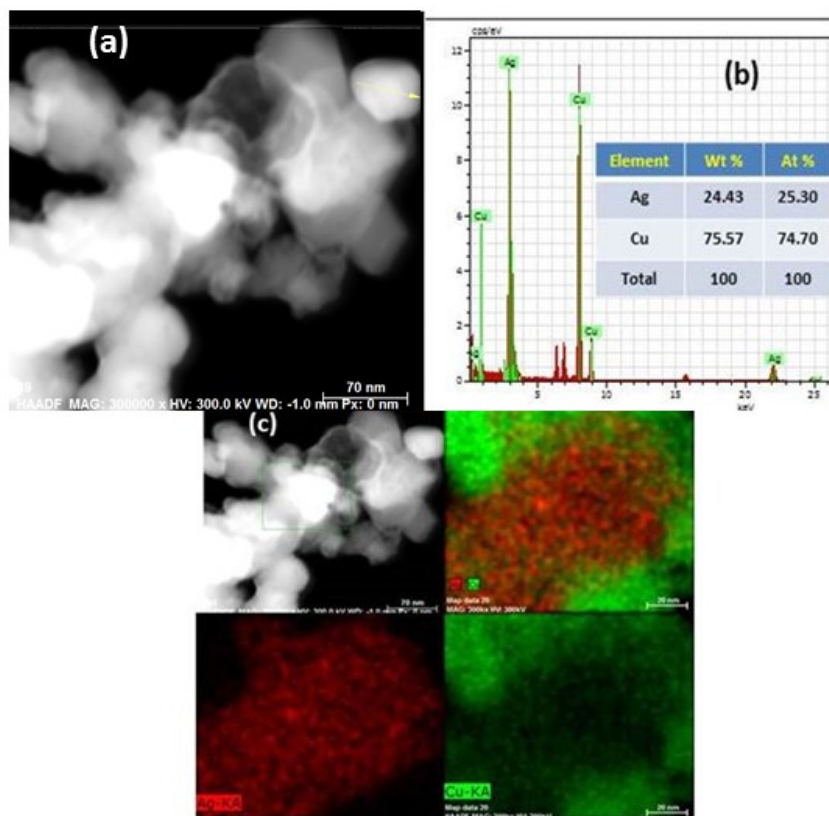

Fig. S2. (a) TEM micrograph (b) EDX and (c) EDS mapping of  $Ag_1-Cu_3$  after 4<sup>th</sup> cycle of catalytic reaction.

# $^1\text{H}$ and $^{13}\text{C}$ of some selected compounds

## (Z)-Ethyl 3-(methyl amino) but-2-enoate (Table 6, Entry 1)

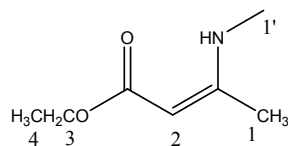

Yellow oil

% purity: 88

$^1\text{H}$  NMR (400MHz,  $\text{CDCl}_3$ )  $\delta$  (ppm): 8.47 (brs, 1H, NH), 4.42 (s, 1H, 2-CH), 4.04 (q, 2H, 3- $\text{CH}_2$ ), 2.85 (d, 3H, 1'- $\text{CH}_3$ ), 1.82 (s, 3H, 1- $\text{CH}_3$ ), 1.21 (t, 3H, 4- $\text{CH}_3$ )

$^{13}\text{C}$  NMR (100MHz,  $\text{CDCl}_3$ )  $\delta$  (ppm): 14.2, 19.1, 29.2, 5.2, 81.7, 162.5, 170.4.

## (Z)-Ethyl 3-(propyl amino)but-2-enoate (Table 6, Entry 2)

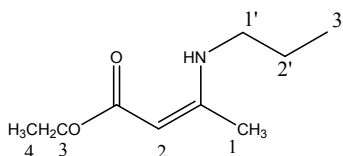

Yellow oil

% purity: 85

$^1\text{H}$  NMR (400 MHz, TMS,  $\text{CDCl}_3$ )  $\delta$  (ppm): 8.59 (s, 1H, NH), 4.45 (s, 1H, 2-CH), 4.07-4.11 (m, 2H, 3- $\text{CH}_2$ ), 3.10-3.15 (m, 2H, 1'- $\text{CH}_2$ ), 1.87 (s, 3H, 1- $\text{CH}_3$ ), 1.52-1.58 (m, 2H, 2'- $\text{CH}_2$ ), 1.19-1.22 (t, 3H, 4- $\text{CH}_3$ ), 0.92-0.95 (t, 3H, 3'- $\text{CH}_3$ ).

$^{13}\text{C}$  NMR (100 MHz, TMS,  $\text{CDCl}_3$ )  $\delta$  (ppm): 11.2, 14.5, 19.2, 23.5, 44.4, 58.1, 83.5, 161.8, 170.53.

## Ethyl 3-(butyl amino) but-2-enoate (Table 6, Entry 3)

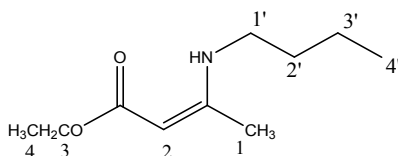

Yellow oil

% purity: 90

$^1\text{H}$  NMR (400 MHz, TMS,  $\text{CDCl}_3$ )  $\delta$  (ppm): 9.12 (s, 1H, NH), 4.61 (s, 1H, 2-CH), 4.18 (m, 2H, 3- $\text{CH}_2$ ), 3.25 (t, 2H, 1'- $\text{CH}_2$ ), 1.94 (s, 3H, 1- $\text{CH}_3$ ), 1.39-1.61 (m, 4H, 2', 3'- $\text{CH}_2$ ), 1.28 (t, 3H, 4- $\text{CH}_3$ ), 0.96 (t, 3H, 4'- $\text{CH}_3$ ).

$^{13}\text{C}$  NMR (100 MHz, TMS,  $\text{CDCl}_3$ )  $\delta$  (ppm): 13.4, 18.4, 20.2, 28.3, 32.4, 42.6, 59.1, 95.0, 163.1, 194.1.

**Ethyl 3-(phenyl amino)but-2-enoate (Table 6, Entry 4)**

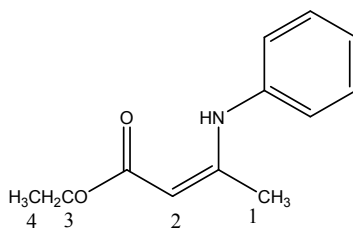

Yellow oily liquid

% purity: 95

$^1\text{H}$  NMR (400 MHz, TMS,  $\text{CDCl}_3$ )  $\delta$  (ppm): 10.39 (s, 1H, NH), 7.32–7.36 (m, 2H, 2 x ArH), 7.09–7.17 (m, 3H, 3 x ArH), 4.71 (s, 1H, 2-CH), 4.14–4.20 (m, 2H, 3- $\text{CH}_2$ ), 2.01 (s, 3H, 1- $\text{CH}_3$ ), 1.27 (m, 3H, 4- $\text{CH}_3$ ).

$^{13}\text{C}$  NMR (100 MHz, TMS,  $\text{CDCl}_3$ )  $\delta$  (ppm): 170.4, 158.97, 139.35, 129.05, 124.92, 124.44, 86.01, 58.76, 20.32, 14.59.

**Ethyl 3-morpholinobut-2-enoate (Table 6, Entry 5)**

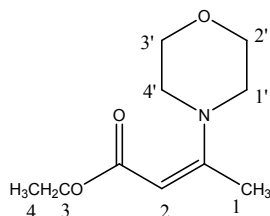

Yellow solid

m.p-55-56 °C

$^1\text{H}$  NMR (400 MHz, TMS,  $\text{CDCl}_3$ )  $\delta$  (ppm): 4.77 (s, 1H, 2-CH), 4.05-4.10 (m, 2H, 3- $\text{CH}_2$ ), 3.66-3.71 (m, 4H, 2', 3'- $\text{CH}_2$ ), 3.19-3.23 (m, 4H, 1', 4'- $\text{CH}_2$ ), 2.40 (s, 3H, 1- $\text{CH}_3$ ), 1.22-1.27 (m, 3H, 4- $\text{CH}_3$ ).

$^{13}\text{C}$  NMR (100 MHz, TMS,  $\text{CDCl}_3$ )  $\delta$  (ppm): 168.6, 160.9, 88.1, 66.0, 58.4, 46.1, 15.0, 14.2.

**Ethyl 3-(benzyl amino)but-2-enoate (Table 6, Entry 6)**

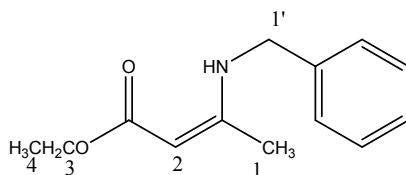

Yellow oily liquid

% purity: 90

$^1\text{H}$  NMR (400 MHz,  $\text{CDCl}_3$ )  $\delta$  (ppm): 1.2 (t, 3H, 4- $\text{CH}_3$ ), 1.90 (s, 3H, 1- $\text{CH}_3$ ), 4.10 (q, 2H, 3- $\text{CH}_2$ ), 4.42 (d, 2H, 1'- $\text{CH}_2$ ), 4.55 (s, 1H, 2-CH), 7.22–7.40 (m, 5H, ArH), 8.94 (br s, 1H, NH).

$^{13}\text{C}$  NMR (100 MHz,  $\text{CDCl}_3$ )  $\delta$  (ppm): 14.7, 19.5, 24.1, 46.8, 58.5, 83.2, 126.8, 127.4, 128.8, 138.8, 161.0, 170.6.

**Ethyl 3-(4-methoxyphenylamino)but-2-enoate (Table 6, Entry 8)**

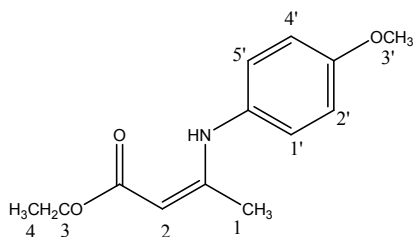

Yellow oil

% purity: 85

<sup>1</sup>H NMR (CDCl<sub>3</sub>, 400 MHz) δ (ppm): 1.29(t, 3H, 4-CH<sub>3</sub>), 1.84 (s, 3H, 1-CH<sub>3</sub>), 3.76 (s, 3H, b3'-CH<sub>3</sub>), 4.10(q, 2H, 3-CH<sub>2</sub>), 4.58 (s, 1H, 2-CH), 6.81 (d, 2H, 1'-4' CH, CH), 7.08 (d, 2H, 2'-5' CH, CH), 10.35 (brs, 1H, NH).

<sup>13</sup>C NMR (CDCl<sub>3</sub>, 100 MHz) δ (ppm): 14.4, 19.4, 55.3, 58.4, 84.6, 113.3, 126.8, 131.6, 157.3, 159.5, 170.3.

**Ethyl 3-(p-Tolylamino)but-2-enoate (Table 6, Entry 9)**

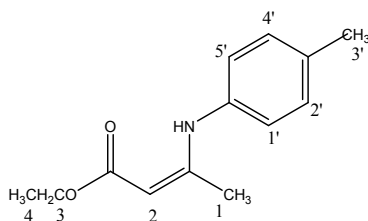

Yellow oil

% purity: 82

<sup>1</sup>H NMR (400MHz, CDCl<sub>3</sub>) δ (ppm): 10.36 (s, 1H, NH), 7.11–7.14 (m, 2H, 1'-4'- CH,CH), 6.92–6.96 (m, 2H, 2'-5'- CH,CH), 4.68 (s, 1H, 2-CH), 4.15 (q, 2H, 3-CH<sub>2</sub>), 2.33 (s, 3H, 3'-CH<sub>3</sub>), 1.91 (s, 3H, 1-CH<sub>3</sub>), 1.26 (t, 3H, 4-CH<sub>3</sub>).

<sup>13</sup>C NMR (100 MHz, CDCl<sub>3</sub>) δ (ppm): 14.5, 20.1, 20.8, 58.6, 85.3, 124.6, 129.5, 134.6, 137.0, 159.3, 170.3.

**Ethyl 3-(cyclohexylamino) but-2-enoate (Table 6, Entry 10)**

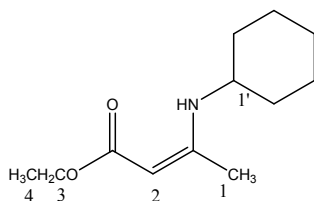

Yellow oily liquid

% purity: 94

<sup>1</sup>H NMR (400MHz, CDCl<sub>3</sub>) δ (ppm): 1.22 (t, 3H, 4-CH<sub>3</sub>), 1.25–1.88 (m, 10H, cyclohexyl), 1.93 (s, 3H, 1-CH<sub>3</sub>), 3.29–3.33 (m, 1H, 1'-CH), 4.07 (q, 2H, 3-CH<sub>2</sub>), 4.38 (s, 1H, 2-CH), 8.63 (br, s, 1H).

<sup>13</sup>C NMR (100 MHz, CDCl<sub>3</sub>) δ (ppm): 14.73, 19.21, 24.71, 25.47, 34.56, 51.41, 58.23, 60.36, 81.78, 160.79, 170.63.

**Ethyl 3-(isopropyl amino) but-2-enoate (Table 6, Entry 12)**

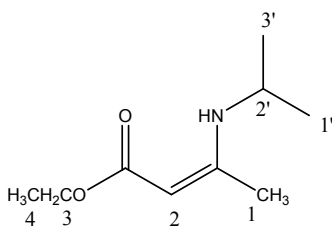

% purity: 84

$^1\text{H}$  NMR (400MHz,  $\text{CDCl}_3$ )  $\delta$  (ppm): 1.24-1.31 (m, 9H, 4-1'-3'- $\text{CH}_3$ ), 1.98 (s, 3H, 1-CH), 3.64-3.78 (m, 1H, 2'-CH), 4.12 (q, 2H, 3- $\text{CH}_2$ ), 4.41 (s, 1H, 2-CH), 8.54 (brs, 1H, NH).

**4-(methylamino) pent-3-en-2-one (Table 6, Entry 13)**

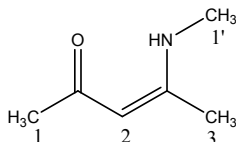

Yellowish oily liquid

% purity: 83

$^1\text{H}$  NMR (400MHz,  $\text{CDCl}_3$ )  $\delta$  (ppm): 5.13 (s, 1H, 2-CH), 2.12 (s, 3H, 1- $\text{CH}_3$ ), 3.1 (d, 3H, 1'- $\text{CH}_3$ ), 10.73 (s, 1H, NH), 1.98 (s, 3H, 3- $\text{CH}_3$ ).

$^{13}\text{C}$  NMR (100 MHz,  $\text{CDCl}_3$ )  $\delta$  (ppm): 17.6, 25.9, 28.1, 94.4, 167.6, 193.2.

**4-(ethyl amino)pent-3-en-2-one (Table 6, Entry 14)**

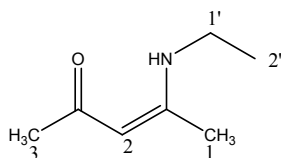

Yellowish oily liquid

% purity: 88

$^1\text{H}$  NMR (400MHz,  $\text{CDCl}_3$ )  $\delta$  (ppm): 5.12 (s, 1H, 2-CH), 4.23 (q, 2H, 1'- $\text{CH}_2$ ), 3.45 (t, 3H, 2'- $\text{CH}_3$ ), 2.12 (s, 3H, 3- $\text{CH}_3$ ), 1.92 (s, 3H, 1- $\text{CH}_3$ ), 10.83 (s, 1H, NH).

$^{13}\text{C}$  NMR (100 MHz,  $\text{CDCl}_3$ )  $\delta$  (ppm): 15.3, 24.1, 28.1, 40.4, 100.3, 159.5, 196.2.

**4-(propyl amino)pent-3-en-2-one (Table 6, Entry 15)**

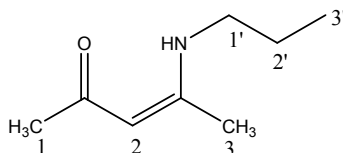

Yellow liquid

% purity: 82

$^1\text{H}$  NMR (400MHz,  $\text{CDCl}_3$ )  $\delta$  (ppm): 10.83 (brs, 1H, NH), 4.93 (s, 1H, 2-CH), 3.12-3.18 (m, 2H, 1'- $\text{CH}_2$ ), 1.94 (s, 3H, 1- $\text{CH}_3$ ), 1.88 (s, 3H, 3- $\text{CH}_3$ ), 1.48-1.62 (m, 2H, 2'- $\text{CH}_2$ ), 0.92-0.98 (m, 3H, 3'- $\text{CH}_3$ ).

$^{13}\text{C}$  NMR (100 MHz,  $\text{CDCl}_3$ )  $\delta$  (ppm): 11.4, 18.2, 23.2, 28.2, 44.4, 94.8, 162.6, 194.1.

**4-(butyl amino)pent-3-en-2-one (Table 6, Entry 16)**

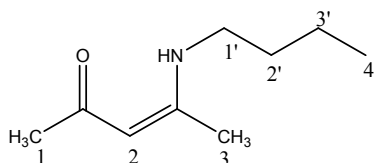

Yellow liquid

% purity: 91

$^1\text{H}$  NMR (400MHz,  $\text{CDCl}_3$ )  $\delta$  (ppm): 0.96 (t, 3H,  $\text{CH}_3$ ), 1.38-1.42 (m, 2H,  $\text{CH}_2$ ), 1.44-1.61 (m, 2H,  $\text{CH}_2$ ), 1.92 (s, 3H,  $\text{CH}_3$ ), 2.01 (s, 3H,  $\text{CH}_3$ ), 3.21 (q, 2H,  $\text{CH}_2$ ), 4.96 (s, 1H, CH), 10.87 (brs, 1H, NH);

$^{13}\text{C}$  NMR (100 MHz,  $\text{CDCl}_3$ )  $\delta$  (ppm): 13.7, 20.5, 27.4, 27.8, 34.7, 49.4 95.0, 156.6, 194.6.

**4-(phenyl amino) pent-3-en-2-one (Table 6, Entry 17)**

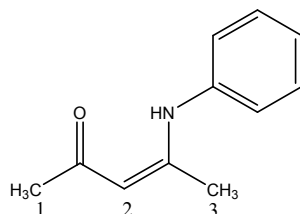

Pale yellow solid

m.p (45-47 °C)

$^1\text{H}$  NMR ( $\text{CDCl}_3$ , 400 MHz)  $\delta$  2.01 (s, 3H, 3- $\text{CH}_3$ ), 2.12 (s, 3H, 1- $\text{CH}_3$ ), 5.20 (s, 1H, 2-CH), 7.12-7.38 (m, 5H, Ar-H), 12.49 (brs, 1H, NH).

$^{13}\text{C}$  NMR ( $\text{CDCl}_3$ , 100 MHz)  $\delta$  19.3, 28.6, 97.2, 124.1, 125.0, 128.6, 138.2, 159.7, 195.5.

**4-(benzylamino)pent-3-en-2-one (Table 6, Entry 19)**

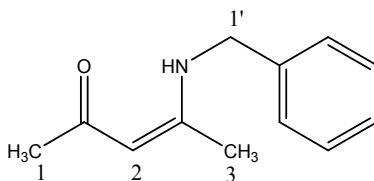

Yellow liquid

% purity: 81

$^1\text{H}$  NMR (400MHz,  $\text{CDCl}_3$ )  $\delta$  (ppm): 11.25 (br s, 1H, NH), 7.21-7.33 (m, 5H,  $\text{C}_6\text{H}_5$ ), 5.05 (s, 1H), 4.31 (d, , 2H) 2.01 (s, 3H), 1.89 (s, 3H).

$^{13}\text{C}$  NMR (100 MHz,  $\text{CDCl}_3$ )  $\delta$  (ppm): 18.7, 286, 46.5, 95.6, 126.4, 127.1, 128.6, 137.6, 162.7, 195.2.

**4-(4-nitrophenylamino) pent-3-en-2-one (Table 6, Entry 20)**

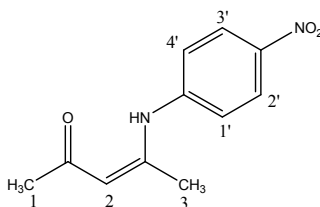

Orange solid

m.p-55-56 °C

$^1\text{H}$  NMR (400MHz,  $\text{CDCl}_3$ )  $\delta$  (ppm): 7.21 (d, 2H, 2', 4'-CH,CH), 8.22 (d, 2H,1'-3', CH, CH), 5.32 (s, 1H, 2-CH), 4.35 (s, 1H, NH), 2.12 (s, 3H,1-  $\text{CH}_3$ ), 1.96 (s, 3H, 3- $\text{CH}_3$ ).

$^{13}\text{C}$  NMR (100 MHz,  $\text{CDCl}_3$ )  $\delta$  (ppm): 38.7, 39.6, 98.0, 112.9, 126.1, 138.1, 145.8, 153.8, 195.2.



#### 4-(p-methoxy phenyl amino) pent-3-en-2-one (Table 6, Entry 21)

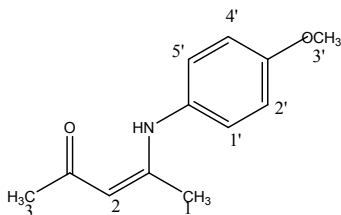

Pale yellow oil

% purity: 85

$^1\text{H}$  NMR (400MHz,  $\text{CDCl}_3$ )  $\delta$  (ppm): 12.34 (br, 1H, NH), 7.01(d, 2H, 1'-2', CH-CH), 6.84 (d, 2H, 2'-5', CH-CH), 5.13 (s, 1H, 2-CH), 3.81 (s, 3H, 3'-OCH<sub>3</sub>), 2.18 (s, 3H, 3-CH<sub>3</sub>), 1.93 (s, 3H, 1-CH<sub>3</sub>).

$^{13}\text{C}$  NMR (100 MHz,  $\text{CDCl}_3$ )  $\delta$  (ppm): 19.3, 28.6, 55.3, 96.3, 114.0, 126.6, 131.1, 157.6, 161.0, 195.7.

#### 4-(cyclohexylamino) pent-3-en-2-one (Table 6, Entry 23)

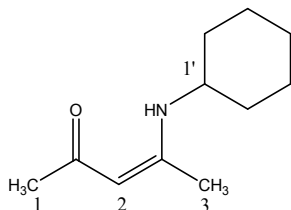

Yellow oil

% purity: 90

$^1\text{H}$  NMR (400MHz,  $\text{CDCl}_3$ )  $\delta$  (ppm): 1.22–1.77 (m, 10H, cyclohexyl), 1.79 (s, 3H, 3-CH<sub>3</sub>), 1.85 (s, 3H, 1-CH<sub>3</sub>), 3.24–3.29 (m, 1H, 1'-CH), 4.82 (s, 1H, 2-CH), 10.89 (br, s, 1H, NH).

$^{13}\text{C}$  NMR (100 MHz,  $\text{CDCl}_3$ )  $\delta$  (ppm): 19.2, 24.07, 24.99, 29.54, 31.46, 51.13, 94.59, 161.56, 206.1.

#### 4-(isopropyl amino) pent-3-en-2-one (Table 6, Entry 25)

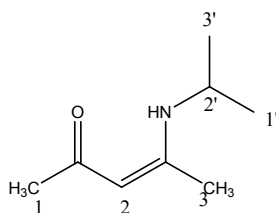

Yellowish oil

% purity: 83

$^1\text{H}$  NMR (400MHz,  $\text{CDCl}_3$ )  $\delta$  (ppm):  $\delta$  10.83 (br, 1H, NH), 4.91 (s, 1H, 2-CH), 3.71 (m, 1H, 2'-CH), 2.1 (s, 3H, 1-CH<sub>3</sub>), 1.94 (s, 3H, 3-CH<sub>3</sub>), 1.23 (d, 6H, 1'-3'-CH<sub>3</sub>).

#### Methyl 3-(ethyl amino)but-2-enoate (Table 6, Entry 26)

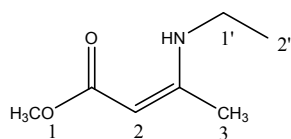

Yellowish oily liquid

% purity: 82

$^1\text{H}$  NMR (400MHz,  $\text{CDCl}_3$ )  $\delta$  (ppm): 10.82 (s, 1H, NH), 5.12 (s, 1H, 2-CH), 4.31 (m, 2H, 1'-CH), 3.41 (t, 3H, 2'- $\text{CH}_3$ ), 2.13 (s, 3H, 1- $\text{OCH}_3$ ) 1.81 (s, 3H, 3- $\text{CH}_3$ ).

$^{13}\text{C}$  NMR (100 MHz,  $\text{CDCl}_3$ )  $\delta$  (ppm): 15.2, 24.1, 28.2, 40.4, 100.2, 159.2, 170.2.

**Methyl 3-(propyl amino) but-2-enoate (Table 6, Entry 27)**

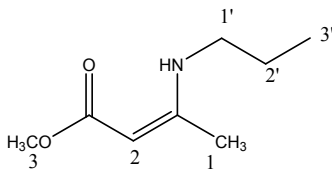

Orange solid

m.p- 46-48 °C

$^1\text{H}$  NMR (400MHz,  $\text{CDCl}_3$ )  $\delta$  (ppm): 8.21 (s, 1H, NH), 4.63 (s, 1H, 2-CH), 3.62 (s, 3H, 3- $\text{CH}_3$ ), 2.28 (m, 2H, 1'- $\text{CH}_2$ ), 1.53 (s, 3H, 1- $\text{CH}_3$ ), 1.23 (m, 2H, 2'- $\text{CH}_2$ ), 0.94 (t, 3H, 3'- $\text{CH}_3$ ).

$^{13}\text{C}$  NMR (100 MHz,  $\text{CDCl}_3$ )  $\delta$  (ppm): 11.1, 18.6, 23.1, 28.4, 44.6, 94.8, 162.8, 171.2.

**Methyl 3-(butyl amino) but-2-enoate (Table 6, Entry 28)**

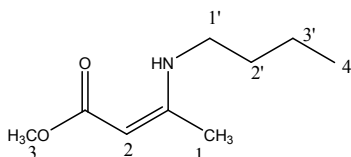

Yellowish oily liquid

% purity: 93

$^1\text{H}$  NMR (400 MHz, TMS,  $\text{CDCl}_3$ )  $\delta$  (ppm): 8.56 (s, 1H, NH), 4.40 (s, 1H, 2-CH), 3.19 (m, 2H, 1'- $\text{CH}_2$ ), 1.91 (s, 3H, 3- $\text{OCH}_3$ ), 1.89 (s, 3H, 1- $\text{CH}_3$ ), 1.46–1.57(m, 2H, 2'- $\text{CH}_2$ ), 1.29–1.38 (m, 2H, 3'- $\text{CH}_2$ ), 0.86 (m, 3H, 4'- $\text{CH}_3$ ).

$^{13}\text{C}$  NMR (100 MHz, TMS,  $\text{CDCl}_3$ )  $\delta$  (ppm): 13.5, 19.6, 22.7, 28.4, 31.8, 42.2, 94.6, 162.9, 173.2.

**Methyl 3-(phenyl amino)but-2-enoate (Table 6, Entry 29)**

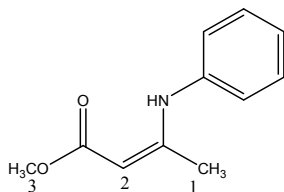

Yellowish oily liquid

% purity: 88

$^1\text{H}$  NMR (400 MHz, TMS,  $\text{CDCl}_3$ )  $\delta$  (ppm): 2.01 (s, 3H, 1- $\text{CH}_3$ ), 3.70(s, 3H, 3- $\text{OCH}_3$ ), 4.71 (s, 1H, 2-CH), 7.18 (m, 3H, Ar-H), 7.20-7.34 (m, 2H, Ar-H), 10.37 (br s, 1H, NH).

$^{13}\text{C}$  NMR (100 MHz, TMS,  $\text{CDCl}_3$ )  $\delta$  (ppm): 24.1, 28.0, 96.8, 114.2, 117.1, 128.2, 136.8, 160.1, 170.5.

**Methyl 3-(benzyl amino) but-2-enoate (Table 6, Entry 31)**

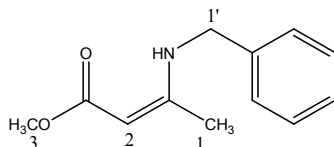

Yellowish oily liquid

% purity: 86

$^1\text{H}$  NMR (400 MHz, TMS,  $\text{CDCl}_3$ )  $\delta$  (ppm): 1.92 (s, 3H, 1- $\text{CH}_3$ ), 3.63 (s, 3H, 3-O $\text{CH}_3$ ), 4.43 (d, 2H, 1'- $\text{CH}_2$ ), 4.53 (s, 1H, 2-CH), 7.24-7.28 (m, 3H, Ar-H), 7.32-7.36 (m, 2H, Ar-H), 8.95 (br s, 1H, NH).

$^{13}\text{C}$  NMR (100 MHz, TMS,  $\text{CDCl}_3$ )  $\delta$  (ppm): 19.4, 46.8, 50.1, 82.6, 126.4, 127.2, 128.6, 138.5, 162.1, 170.6.

**Methyl 3-(4-nitrophenylamino)but-2-enoate (Table 6, Entry 32)**

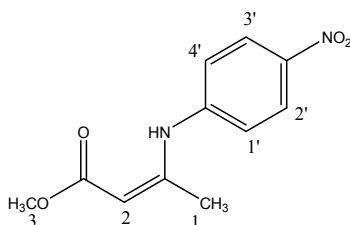

Yellowish oily liquid

% purity: 84

$^1\text{H}$  NMR (400 MHz, TMS,  $\text{CDCl}_3$ )  $\delta$  (ppm): 1.31 (s, 3H, 1- $\text{CH}_3$ ), 2.22 (s, 3H, 3-O $\text{CH}_3$ ), 4.86 (s, 1H, 2-CH), 7.11 (d, 2H, Ar-H), 8.17 (d, 2H, Ar-H), 11.1 (br s, 1H, NH).

$^{13}\text{C}$  NMR (100 MHz, TMS,  $\text{CDCl}_3$ )  $\delta$  (ppm): 20.8, 50.6, 91.0, 120.5, 125.2, 145.6, 155.7, 159.1, 170.1.

**Methyl 3-(p-tolyl amino) but-2-enoate (Table 6, Entry 34)**

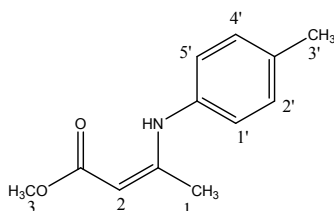

Yellow Oily liquid

% purity: 81

$^1\text{H}$  NMR (400 MHz, TMS,  $\text{CDCl}_3$ )  $\delta$  (ppm): 1.95 (s, 3H, 1- $\text{CH}_3$ ), 2.33 (s, 3H, 3-O $\text{CH}_3$ ), 3.66 (s, 3H, 3'- $\text{CH}_3$ ), 4.65 (s, 1H, 2-CH), 6.95 (d, 2H, ArH), 7.12 (d, 2H, ArH), 10.32 (br s, 1H, NH).

$^{13}\text{C}$  NMR (100 MHz, TMS,  $\text{CDCl}_3$ )  $\delta$  (ppm): 20.1, 20.7, 50.1, 85.1, 124.5, 129.4, 130.6, 136.5, 159.4, 170.7.

**1-phenyl-3-(phenyl amino)but-2-en-1-one (Table 6, Entry 39)**

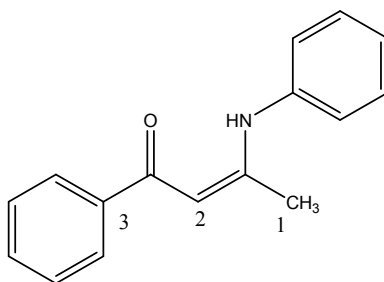

Yellow Oil

% purity: 90

$^1\text{H}$  NMR (400 MHz, TMS,  $\text{CDCl}_3$ )  $\delta$  (ppm): 2.11 (s, 3H, 1- $\text{CH}_3$ ), 5.84 (s, 1H, 2-CH), 7.13–7.24 (m, 3H, ArH), 7.31–7.43 (m, 3-ArXH), 7.90–7.95 (m, 2H, ArH), 11.8 (brs, 1H, NH).

$^{13}\text{C}$  NMR (100 MHz, TMS,  $\text{CDCl}_3$ )  $\delta$  (ppm): 20.4, 93.3, 122.8, 126.8, 127.8, 128.6, 129.1, 131.1, 138.5, 140.2, 162.2, 188.5.

**3-(benzyl amino)-1-phenylbut-2-en-1-one (Table 6, Entry 40)**

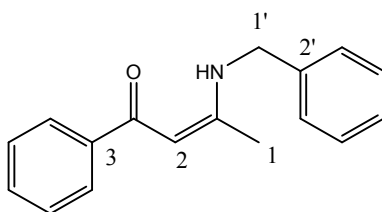

Yellow Oily liquid

% purity: 92

$^1\text{H}$  NMR (400 MHz, TMS,  $\text{CDCl}_3$ )  $\delta$  (ppm): 2.07 (s, 3H, 1- $\text{CH}_3$ ), 4.52 (d, 2H, 1'- $\text{CH}_2$ ), 5.73 (s, 1H, 2-CH), 7.20–7.42 (m, 8H, ArH), 7.85–7.82 (m, 2H, Ar-H), 12.31 (bs, 1H, NH).

$^{13}\text{C}$  NMR (100 MHz, TMS,  $\text{CDCl}_3$ )  $\delta$  (ppm): 9.5, 47.3, 92.6, 126.8, 127.1, 127.6, 128.2, 128.9, 130.6, 137.8, 140.3, 165.0.
